# Supplementary material
Source: PubMed Central journal article supplement (PMC4485328)
Supplement: DS_10.1177_0022034515577413.pdf [file DS_10.1177_0022034515577413.pdf]

# Lactoferrin: A Roadmap to the Borderland between Caries and Periodontal Disease

D.H. Fine<sup>1</sup>

## Appendix

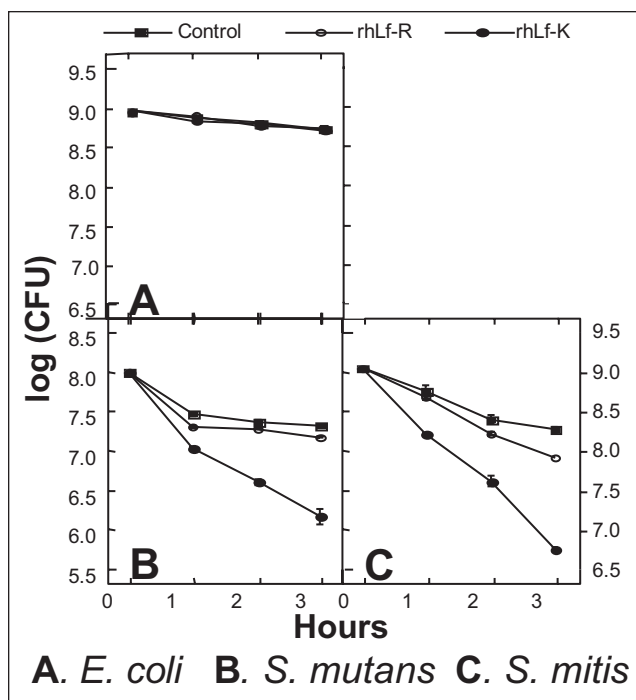

**Appendix Figure.** Activity of human recombinant lactoferrin lysine (rhLf-K) and arginine (rhLf-R) variants against selected Gram-negative and Gram-positive bacteria. **(A)** No difference in activity of rhLf lysine or arginine variants. **(B, C)**. Lysine variant shows reduction of growth of *Streptococcus mutans* by >1 log (A) versus arginine variant (B) and by 1 log versus *Streptococcus mitis* (C). CFU, colony-forming unit.

<sup>1</sup>Department of Oral Biology, Rutgers School of Dental Medicine, Rutgers University, Newark, NJ, USA

**Corresponding Author:**

D.H. Fine, Department of Oral Biology, Rutgers School of Dental Medicine, Rutgers University, Medical Science Building, C-636, Newark, NJ, 07103 USA.  
 Email: finedh@sdm.rutgers.edu
